# Supplementary material for: An unprecedented “linear-bent” isomerism in tri-nuclear Cu2IIZnII complexes with a salen type di-Schiff base ligand
Source: Royal Society of Chemistry journal article supplement (doi:10.1039/c2dt31011b), 2012-01-01
Supplement: c2dt31011b.pdf [file c2dt31011b.pdf]

## Supporting information

### An unprecedented “linear-bent” isomerism in tri-nuclear $\text{Cu}_2^{\text{II}}\text{Zn}^{\text{II}}$ complexes with salen type di-Schiff base ligand

Lakshmi Kanta Das<sup>a</sup>, Sung-Woo Park<sup>b</sup>, Seung Joo Cho<sup>c</sup> and Ashutosh Ghosh<sup>\*a</sup>

<sup>a</sup>Department of Chemistry, University College of Science, University of Calcutta, 92, A.P.C. Road, Kolkata-700 009, India; e-mail: ghosh\_59@yahoo.com

<sup>b</sup>Center for Superfunctional Materials, Department of Chemistry, Pohang University of Science and Technology, San 31, Hyojadong, Namgu, Pohang 790-784, Korea.

<sup>c</sup>Department of Cellular Molecular Medicine, College of Medicine, Chosun University, Gwangju 501-759, Republic of Korea.

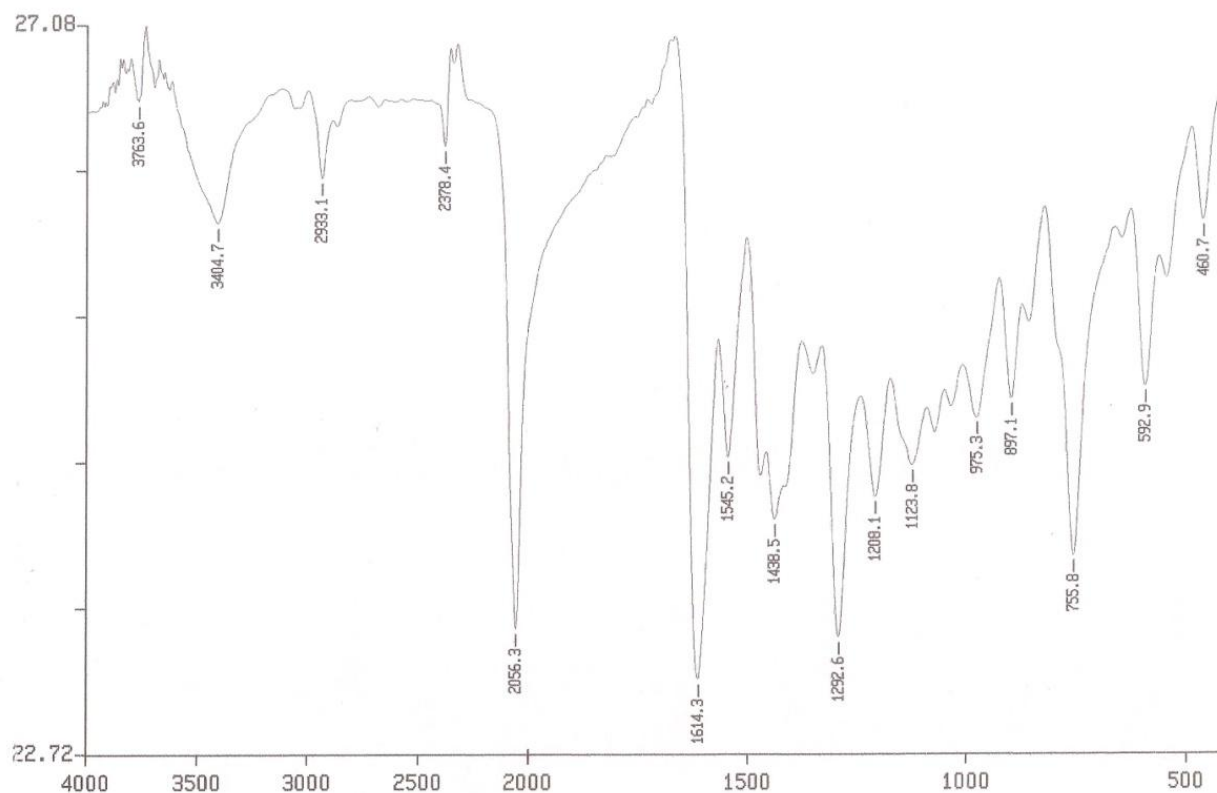

**Fig. S1.** IR spectrum of complex **1A**.

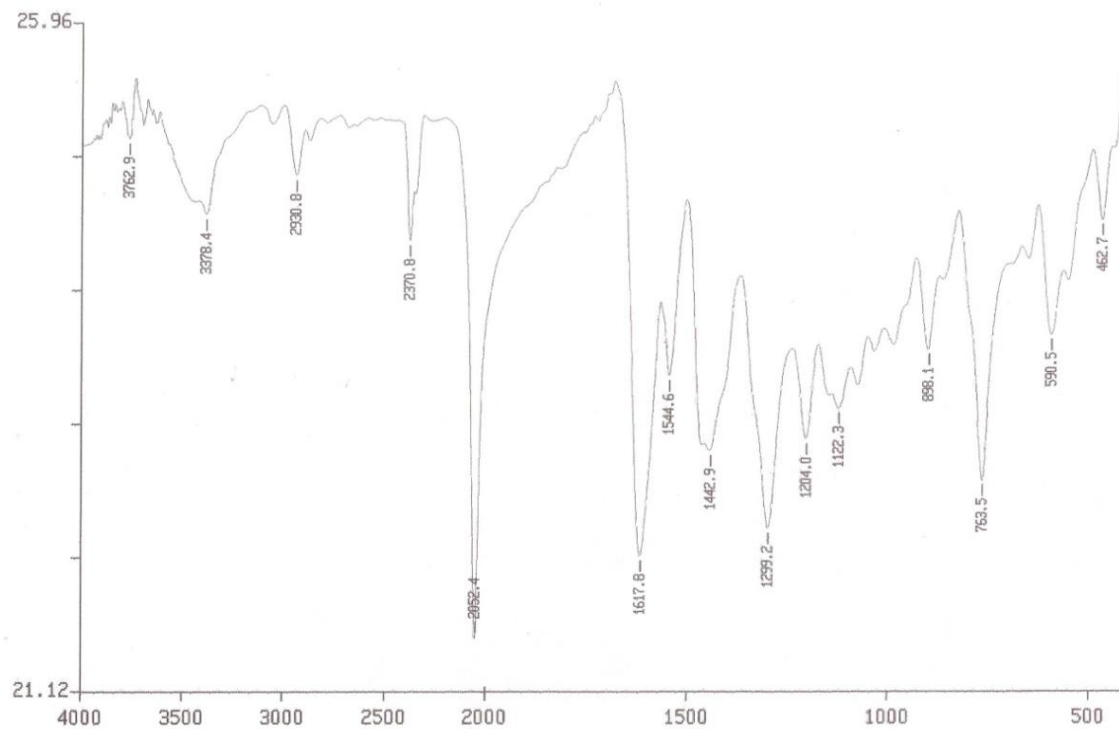

**Fig. S2.** IR spectrum of complex **1B**.

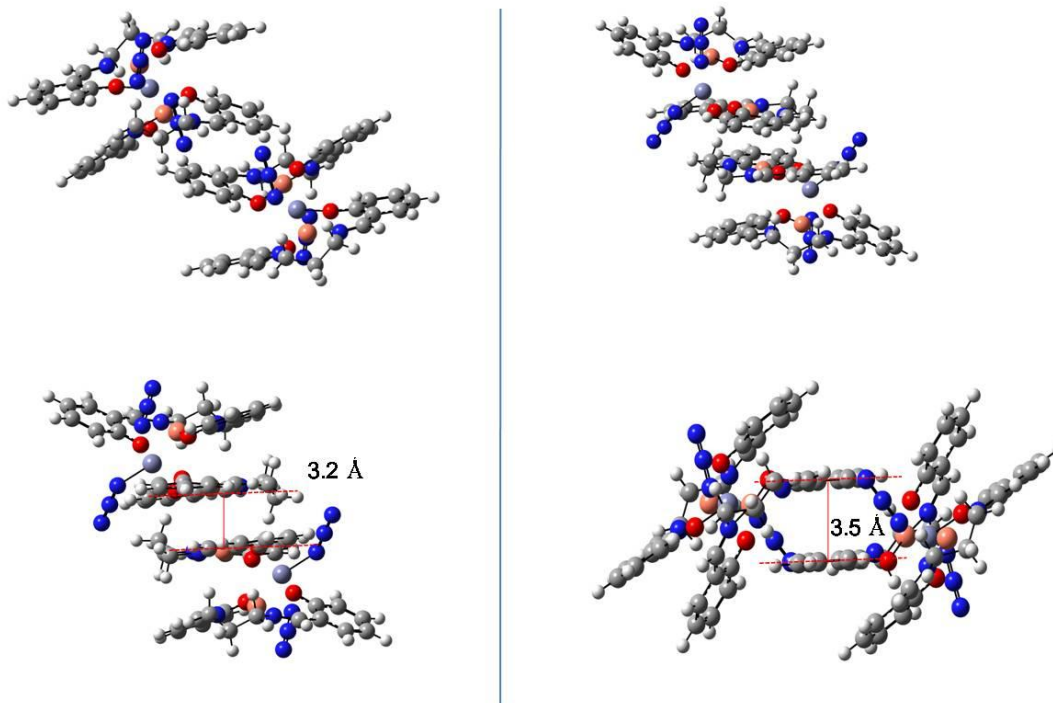

**Fig. S3.** Top-sided view and Side View of Dimer **1A** (Left) and Dimer **1B** (Right).

[Calculation Method : M062x/6-31G\*//(Cu, Zn : LANL2DZ)]

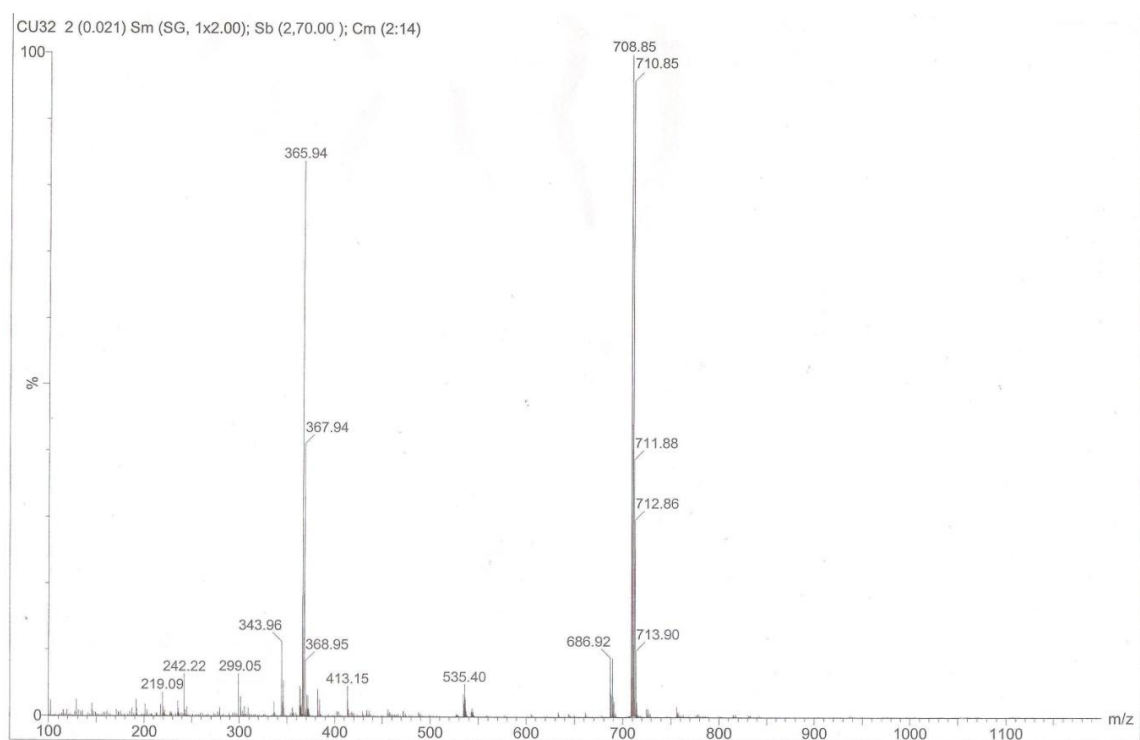

**Fig. S4.** Mass spectrum of complex **1A** in methanol.

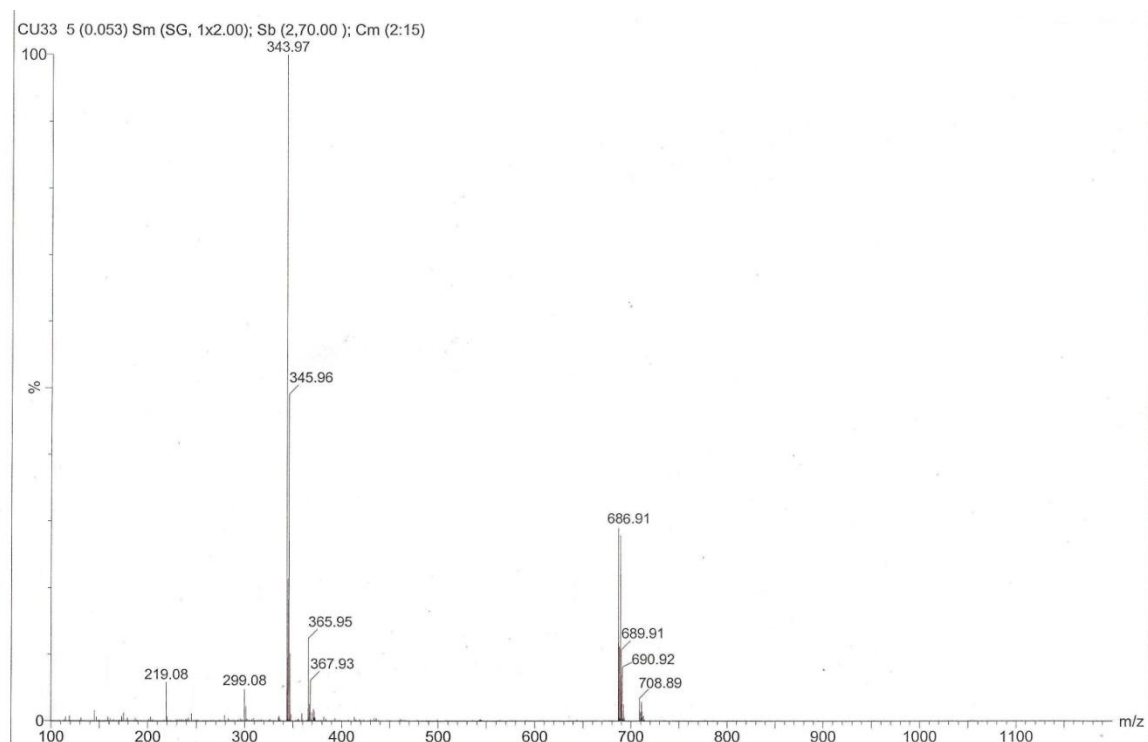

**Fig. S5.** Mass spectrum of complex **1B** in methanol.
